# Supplementary material for: Synthesis, characterization and photoluminescent properties of Zn-based mono- and hetero-MOFs containing the R-isophthalate (R = methyl or tert-butyl) ligands
Source: Royal Society of Chemistry journal article supplement (doi:10.1039/c2nj40752c), 2012-10-19
Supplement: c2nj40752c.pdf [file c2nj40752c.pdf]

# **Synthesis, characterization and photoluminescent properties of Zn-based mono-and hetero-MOFs containing the R-isophthalate (R = methyl or tertbutyl) ligands**

**Qi-Bing Bo,<sup>\*</sup> † Hong-Yan Wang,<sup>†</sup> and Da-Qi Wang<sup>‡</sup>**

<sup>†</sup> School of Chemistry and Chemical Engineering, University of Jinan, Jinan 250022 (China)

<sup>‡</sup> College of Chemistry and Chemical Engineering, Liaocheng University, Liaocheng 252059 (China)

\*Email: [chm\\_boqb@ujn.edu.cn](mailto:chm_boqb@ujn.edu.cn)

## **Electronic Supplementary Information (ESI)**

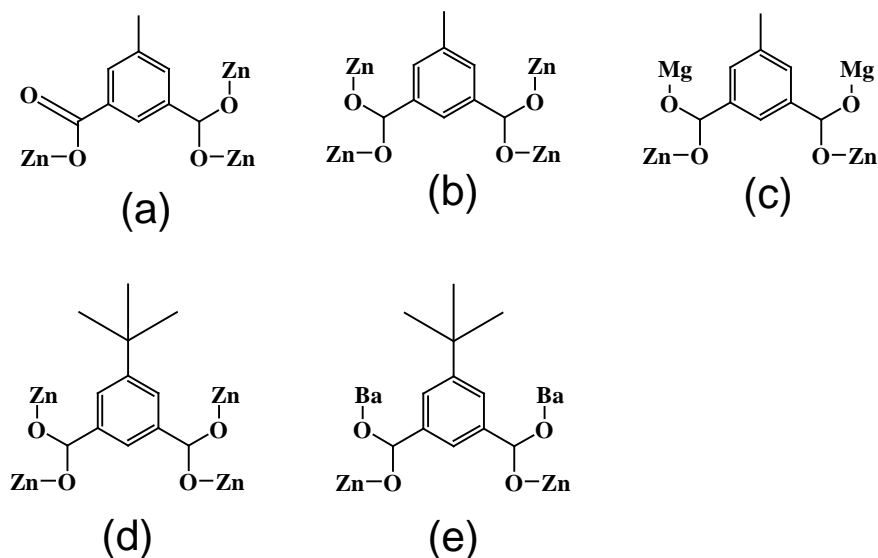

**ESI. 1** Diverse coordination modes of the mip and tbip ligands. For each carboxylate group : (a)  $\mu_1-\eta^1:\eta^0$ -monodentate and  $\mu_2-\eta^1:\eta^1$ -bis-monodentate mode; (b-e)  $\mu_2-\eta^1:\eta^1$ -bis-monodentate mode.

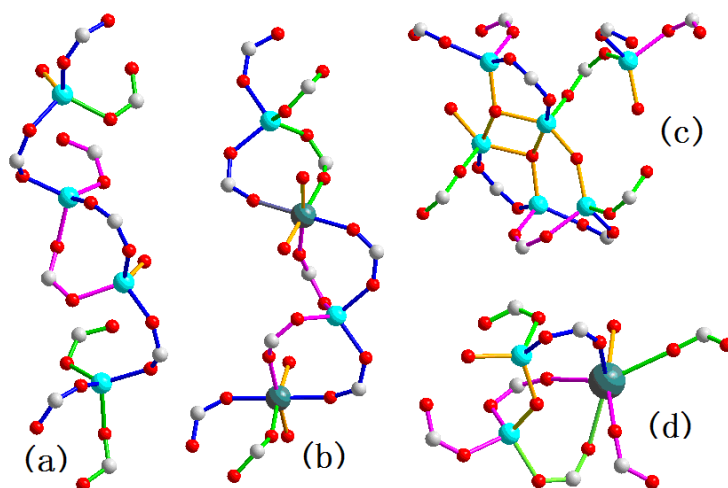

**ESI. 2** Four Zn-based cluster SBUs. (a) 10-connected cluster SBU  $Zn_4(COO)_{10}$  for **Zn-mip**; (b) 10-connected cluster SBU  $Zn_2Mg_2(COO)_{10}$  for **ZnMg-mip**; (c) 11-connected cluster SBU  $Zn_6O_5(COO)_{11}$  for **Zn-tbip**; (d) 7-connected cluster SBU  $Zn_2OBa(COO)_7$  for **ZnBa-tbip**.

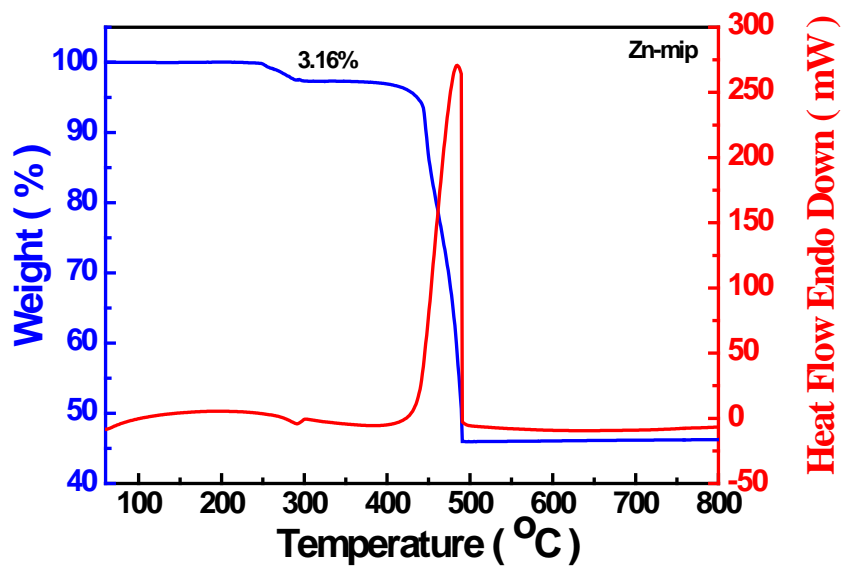

ESI. 3 TG-DTA for MOF Zn-mip.

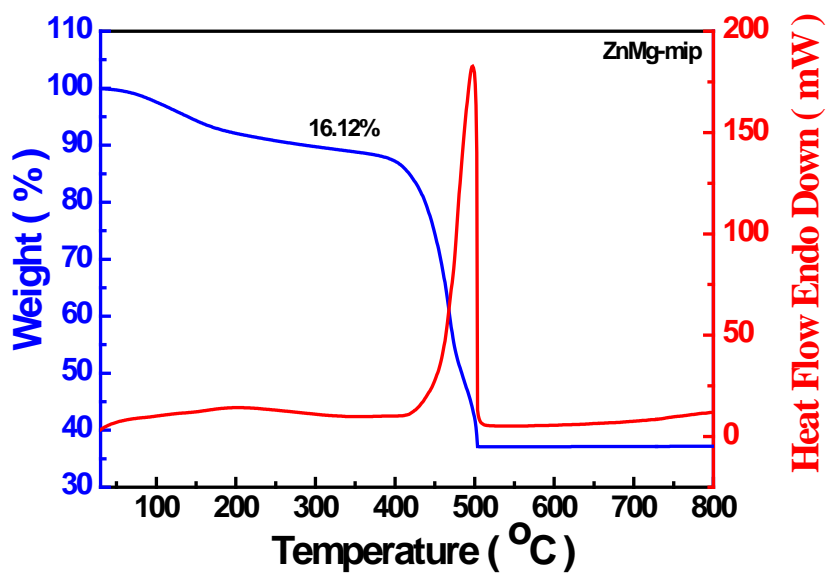

ESI. 4 TG-DTA for MOF ZnMg-mip.

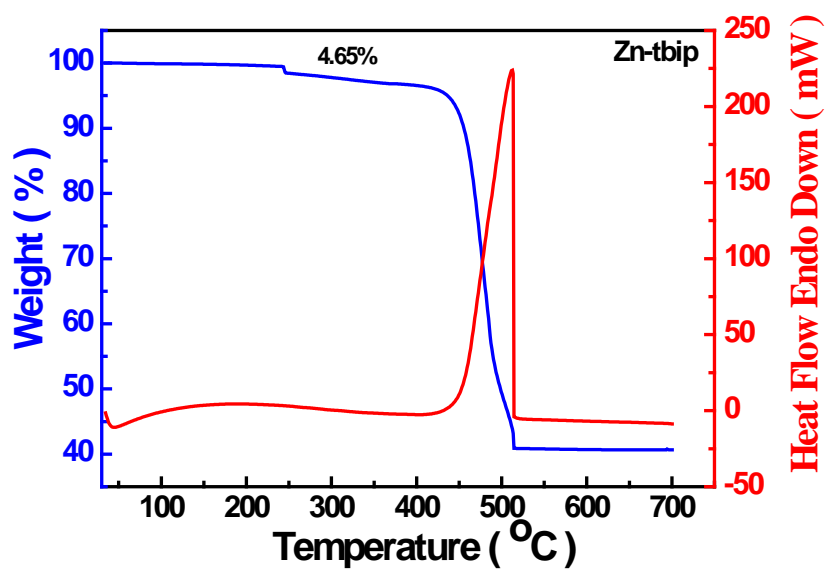

ESI. 5 TG-DTA for MOF Zn-tbip.

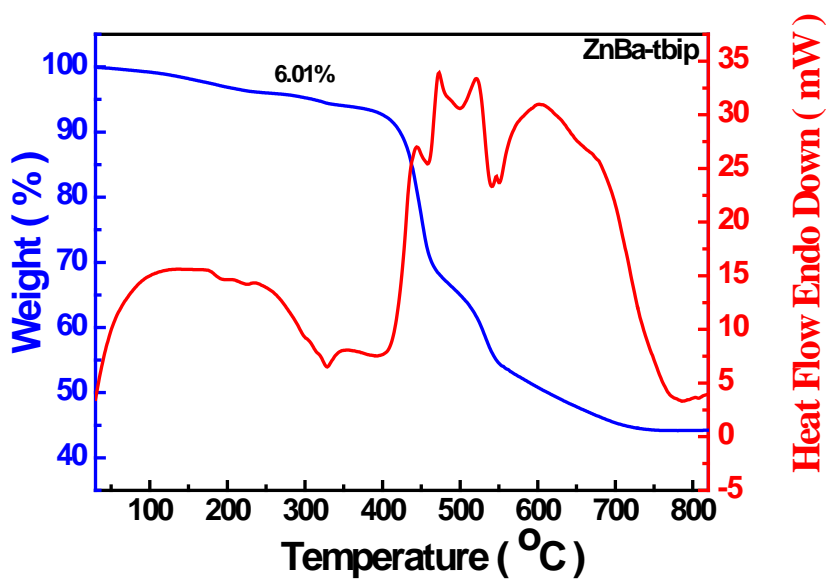

ESI. 6 TG-DTA for MOF ZnBa-tbip.

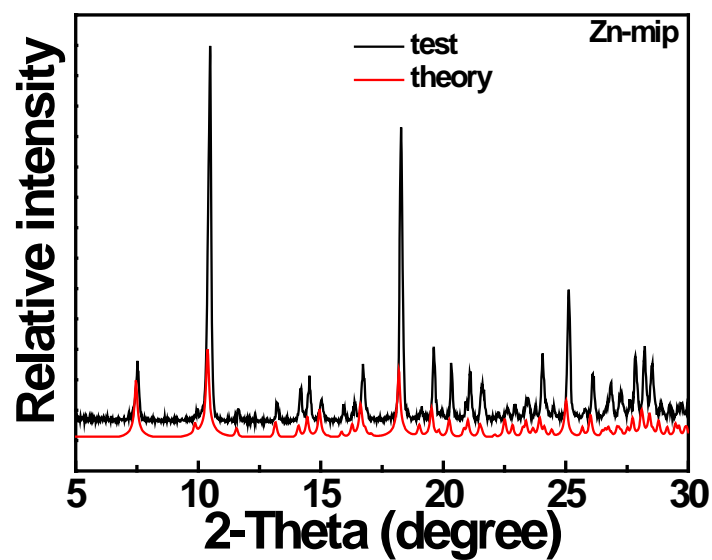

ESI. 7 The XRPD patterns of the simulated and as-synthesized MOFs for **Zn-mip**.

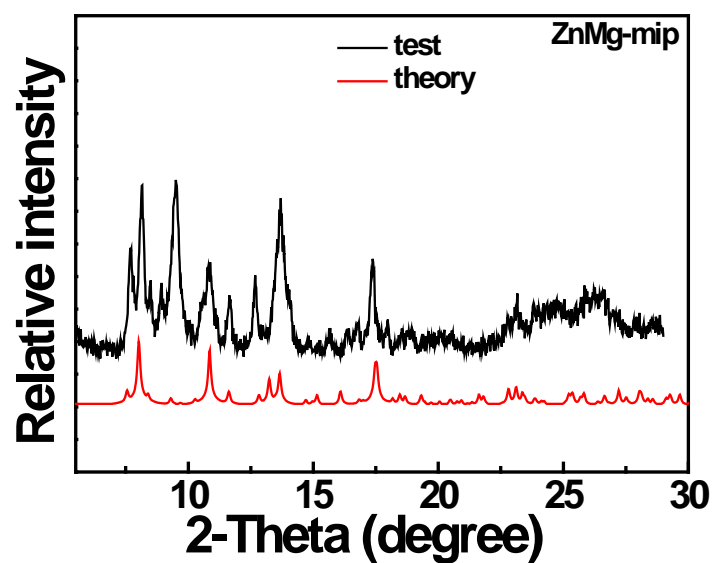

ESI. 8 The XRPD patterns of the simulated and as-synthesized MOFs for **ZnMg-mip**.

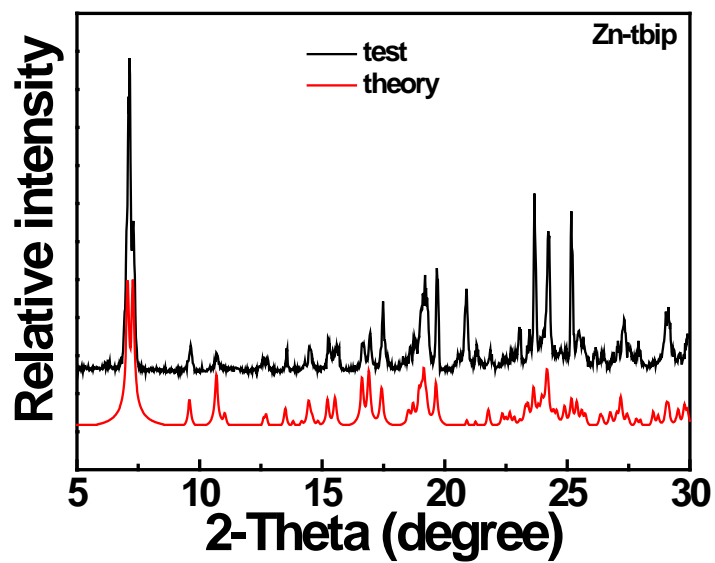

ESI. 9 The XRPD patterns of the simulated and as-synthesized MOFs for **Zn-tbip**.

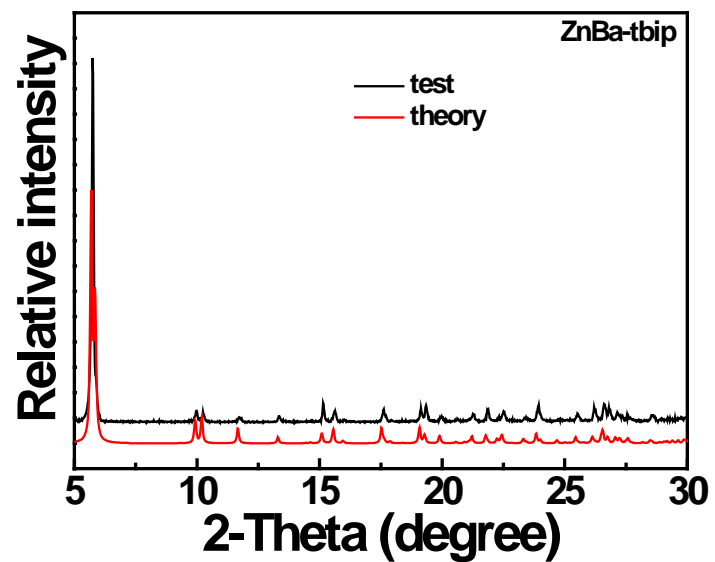

ESI. 10 The XRPD patterns of the simulated and as-synthesized MOFs for **ZnBa-tbip**.

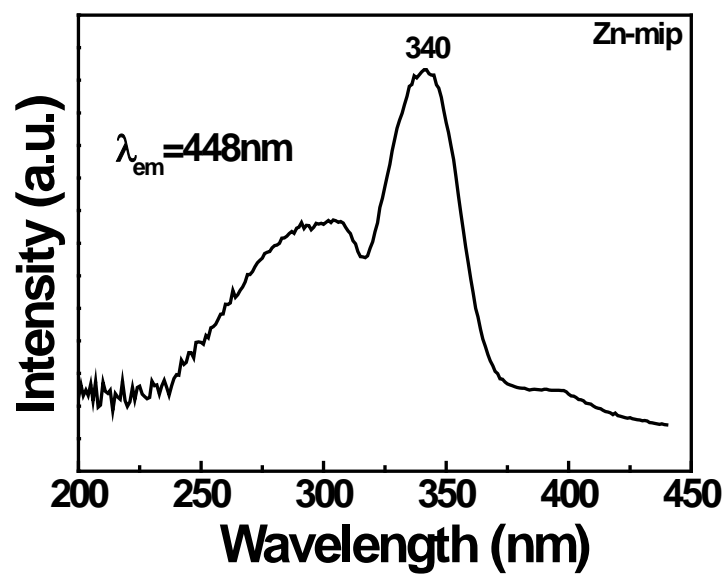

ESI. 11 The excitation spectrum for **Zn-mip**

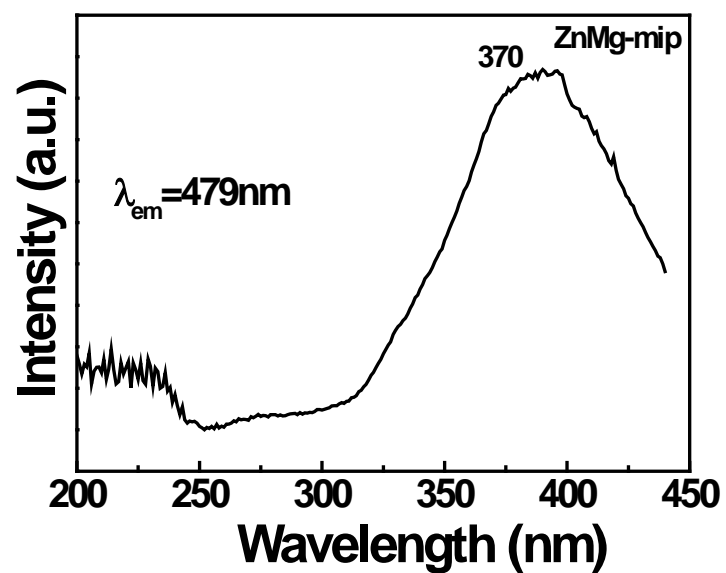

ESI. 12 The excitation spectrum for **ZnMg-mip**

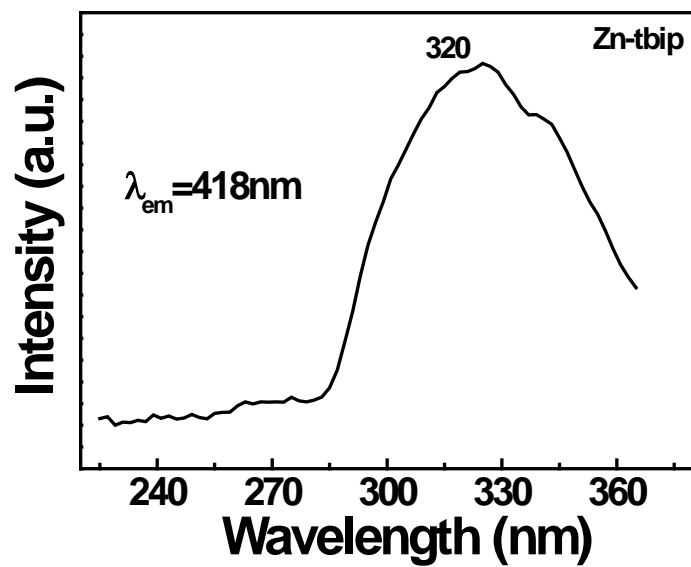

ESI. 13 The excitation spectrum for **Zn-tbip**

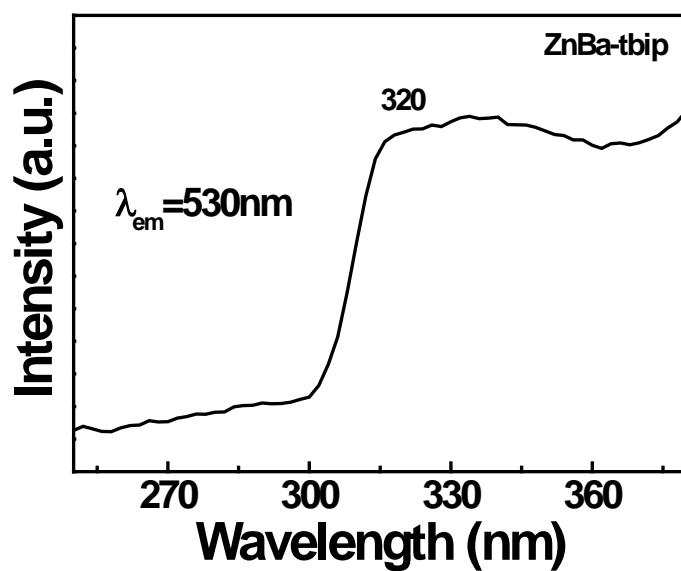

ESI. 14 The excitation spectrum for **ZnBa-tbip**



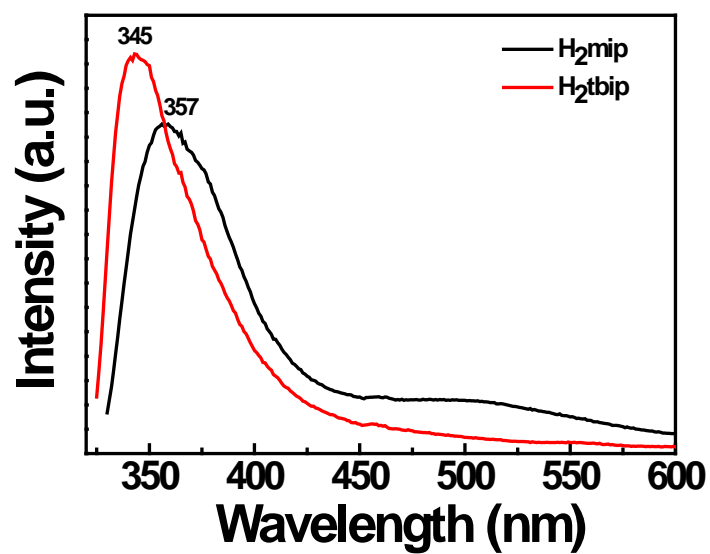

**ESI. 15** The emission spectra excited at 315 nm for the free ligands H<sub>2</sub>mip and H<sub>2</sub>tbip.

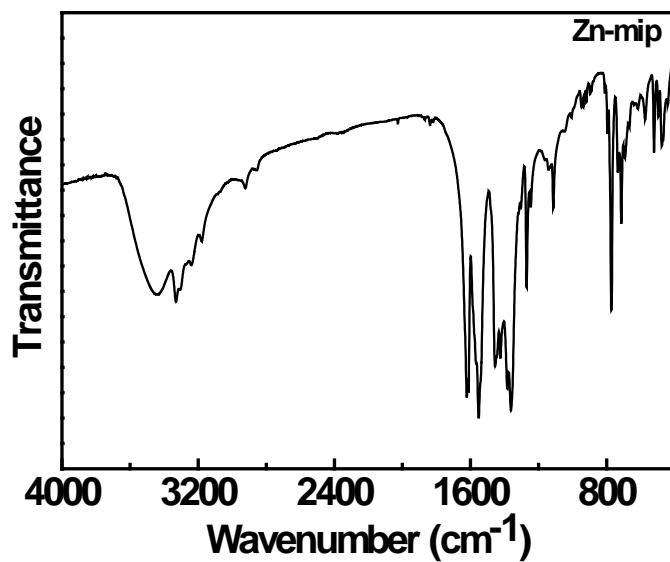

**ESI. 16** FT-IR spectrum for MOF Zn-mip.

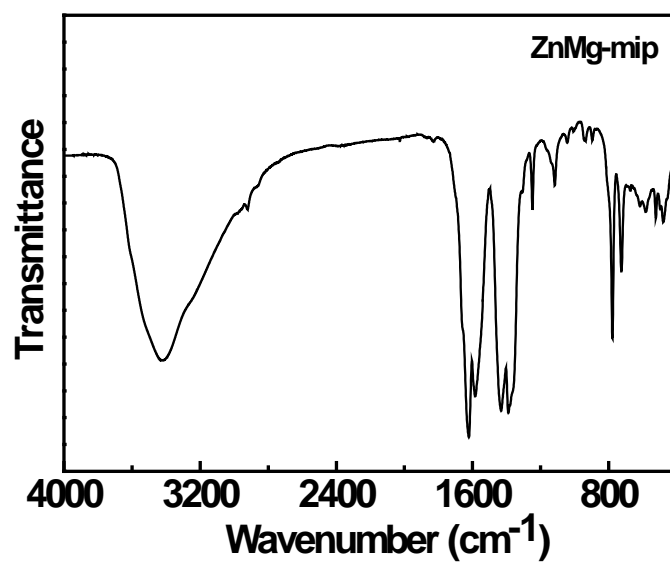

ESI. 17 FT-IR spectrum for MOF ZnMg-mip.

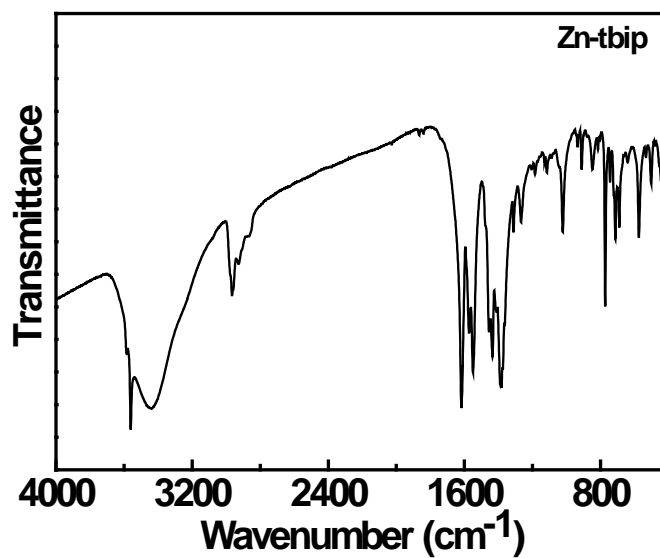

ESI. 18 FT-IR spectrum for MOF Zn-tbip.

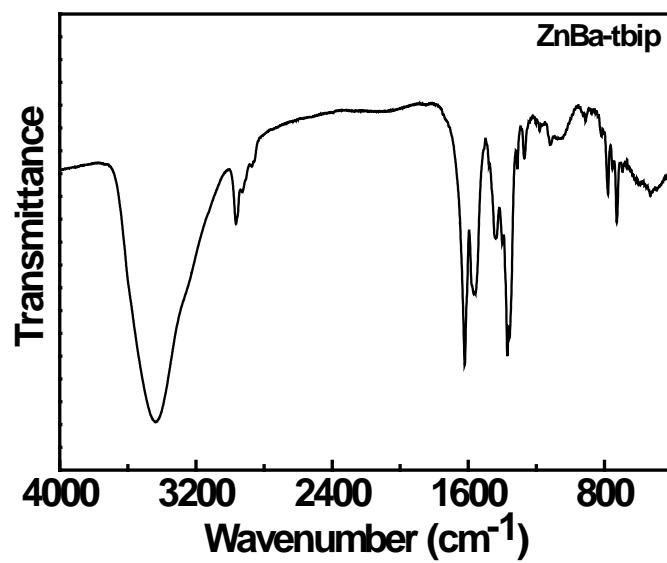

**ESI. 19** FT-IR spectrum for MOF **ZnBa-tbip**.
